# Supplementary material for: 1D nanobar-like LiNi0.4Co0.2Mn0.4O2 as a stable cathode material for lithium-ion batteries with superior long-term capacity retention and high rate capability
Source: Royal Society of Chemistry journal article supplement (doi:10.1039/c7ta02888a), 2017-01-01
Supplement: c7ta02888a1.pdf [file c7ta02888a1.pdf]

Supporting Information

# 1D Nanobar-like $\text{LiNi}_{0.4}\text{Co}_{0.2}\text{Mn}_{0.4}\text{O}_2$ as Stable Cathode Material for Lithium-ion Batteries with Superior Long-term Capacity Retention and High Rate Capability

**Zhen Chen<sup>a,b,c</sup>, Dongliang Chao<sup>b</sup>, Jilei Liu<sup>a,b</sup>, Mark Copley<sup>e</sup>, Jianyi Lin<sup>f</sup>, Zexiang Shen<sup>b,f,‡</sup>, Guk-Tae Kim<sup>c,d,‡</sup>, Stefano Passerini<sup>c,d,‡</sup>**

<sup>a</sup> Energy Research Institute (ERI@N), Interdisciplinary Graduate School, Nanyang Technological

University, Research Techno Plaza, 50 Nanyang Drive, 637553, Singapore

<sup>b</sup> Division of Physics and Applied Physics, School of Physical and Mathematical Sciences, Nanyang

Technological University, 21 Nanyang Link, 637371, Singapore

<sup>c</sup> Helmholtz Institute Ulm (HIU), Electrochemistry I, 89081 Ulm, Germany

<sup>d</sup> Karlsruhe Institute of Technology (KIT), 76021 Karlsruhe, Germany

<sup>e</sup> Johnson Matthey Technology Centre, Reading RG4 9NH, UK

<sup>f</sup> Energy Research Institute (ERI@N), Nanyang Technological University, 50 Nanyang Drive, 637553, Singapore

<sup>‡</sup> Corresponding authors.

Email: stefano.passerini@kit.de, guk-tae.kim@kit.edu, zexiang@ntu.edu.sg.

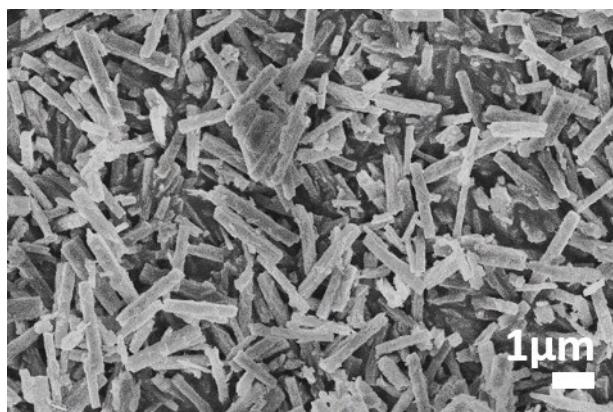

**Fig. S1** SEM image of the nanobar-like (1D)  $MC_2O_4 \cdot H_2O$  (M=Li, Ni, Co, Mn) precursor.

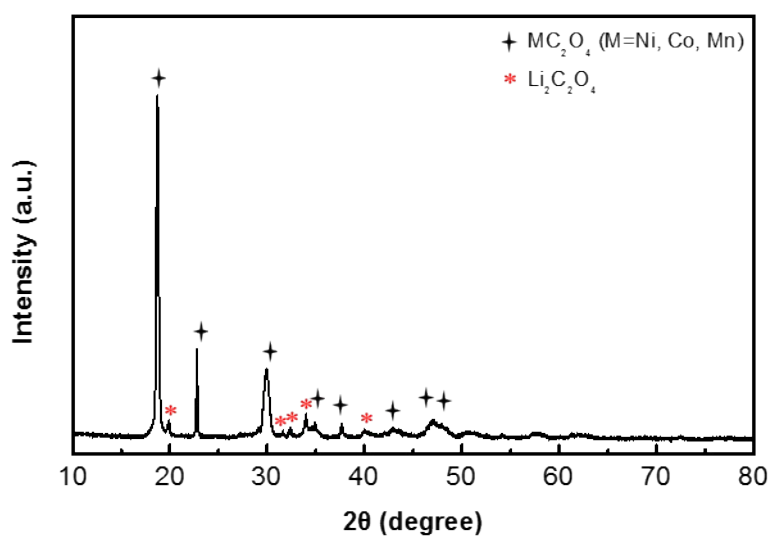

**Fig. S2** XRD pattern of the nanobar-like (1D)  $MC_2O_4 \cdot H_2O$  (M=Li, Ni, Co, Mn) precursor.

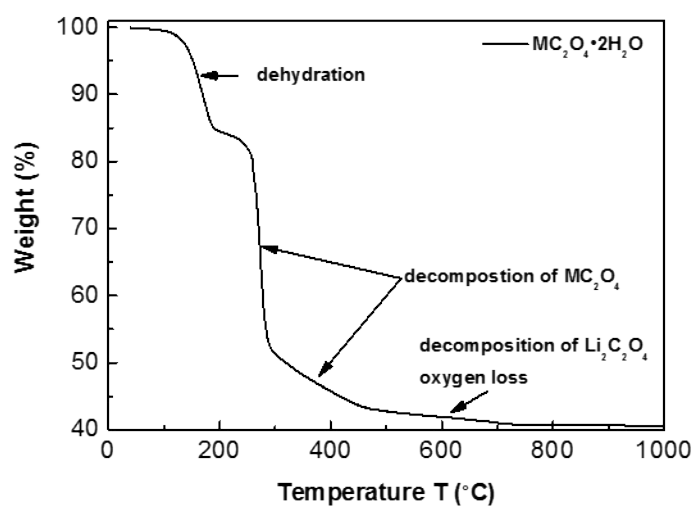

**Fig. S3** TGA data of the nanobar-like (1D)  $MC_2O_4 \cdot H_2O$  (M=Li, Ni, Co, Mn) precursor.

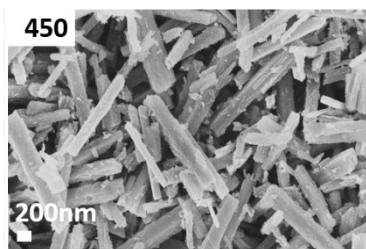

**Fig. S4** SEM images of the nanobar-like (1D)  $MC_2O_4 \cdot H_2O$  (M=Li, Ni, Co, Mn) precursor after pre-heating at 450 °C.

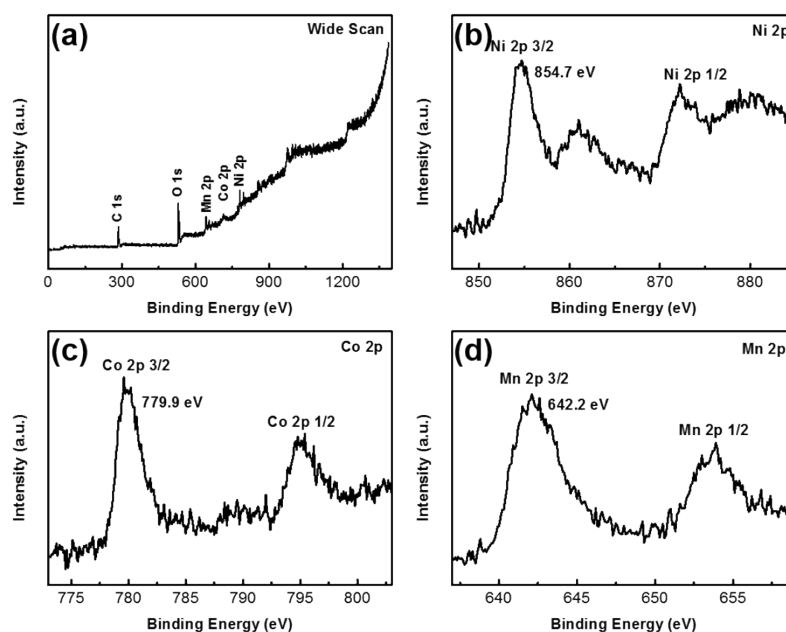

**Fig. S5** X-ray photoelectron spectroscopy spectra (a) wide scan, (b) Ni 2p, (c) Co 2p and (d) Mn 2p of N-NCM-800.

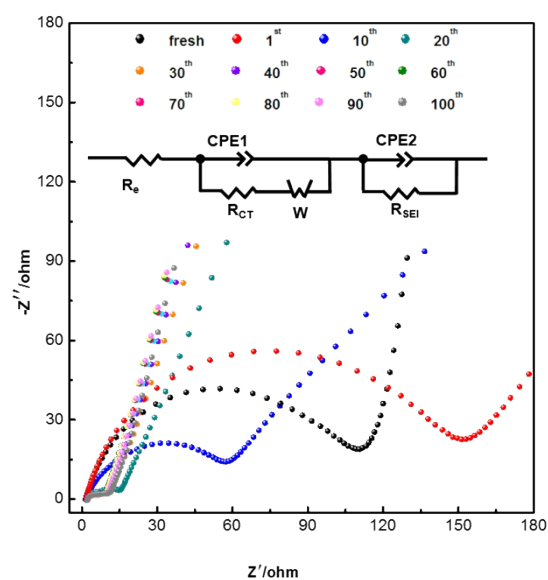

**Fig. S6** Selected electrochemical impedance spectra of N-NCM-800.

Fig. S6 shows the selected electrochemical impedance spectra upon 100 continuous charge/discharge cycles at 0.1 C. The nature of the impedance plots is

typical of conventional LIBs, a depressed semicircle in high-middle frequency and followed by a sharp straight line in the low frequency region. The  $R_e$  shown in the insert panel of equivalent series resistance (ESR) refers to the internal resistance, a combination of total resistance from electrolyte, electrodes, separator. The high-frequency semicircle is assigned to the resistance of the formation of SEI layer and the corresponding constant phase element. The middle-frequency ascribes to the charge transfer resistance and its relative capacitance. The straight line in the low-frequency region corresponds to the Warburg diffusion process.

| Reference                                                 | Voltage Range/ V | Specific Capacity/ mAh g <sup>-1</sup> | Rate Capability/ mAh g <sup>-1</sup> | Cycling Retention                                             |
|-----------------------------------------------------------|------------------|----------------------------------------|--------------------------------------|---------------------------------------------------------------|
| NCM <sup>1</sup>                                          | 2.0-4.7 V        | 203 (0.05 C)                           | ---                                  | 82% after 20 cycles at 0.05 C                                 |
| NCM <sup>2</sup>                                          | 2.75-4.35 V      | 177 (0.2 C)                            | 89 (3 C)                             | 58% after 70 cycles at 1 C                                    |
| Zr-doped NCM <sup>3</sup>                                 | 2.6-4.7 V        | 162 (0.2 C)                            | 124 (2 C)                            | 80% after 50 cycles at 0.2 C<br>69% after 50 cycles at 2 C    |
| NCM <sup>4</sup>                                          | 2.0-4.4 V        | 165 (0.35 C)                           | 70 (7 C)                             | 90% after 50 cycles at 0.35 C                                 |
| Bi <sub>2</sub> O <sub>3</sub> -coated NCM <sup>5</sup>   | 2.5-4.6 V        | 214 (0.1 C)                            | 120 (3 C)                            | 82% after 100 cycles at 0.1 C                                 |
| Micro-ball NCM <sup>6</sup>                               | 2.5-4.5 V        | 187 (0.1 C)                            | 160 (2 C)<br>143 (5 C)               | 80% after 50 cycles at 5 C                                    |
| NCM/SWCNT composites <sup>7</sup>                         | 2.5-4.5 V        | 160 (0.1 C)                            | 130 (5 C)<br>120 (10 C)              | 92% after 500 cycles at 5 C<br>91% after 500 cycles at 10 C   |
| Li <sub>2</sub> ZrO <sub>3</sub> -coated NCM <sup>8</sup> | 2.8-4.5 V        | 178 (0.075 C)                          | 156 (1.5 C)                          | 96.6% after 50 cycles at 0.3 C                                |
| This Work                                                 | 3.0-4.3 V        | 177 (0.1 C)                            | 123 (5 C)<br>104 (10 C)              | 91% after 100 cycles at 0.1 C<br>94% after 100 cycles at 10 C |

**Tab. S1** Comparison of electrochemical performance (capacity, rate capability and cycling stability) of the best performing NCM materials.<sup>1-8</sup>

## References in ESI.

- 1 S. Wolff-Goodrich, F. Lin, I.M. Markus, D. Nordlund, H.L. Xin, M. Asta, M.M. Doeff, *Phys. Chem. Chem. Phys.*, 2015, **17**, 21778-21781.
- 2 H. Rong, M. Xu, B. Xie, W. Huang, X. Liao, L. Xing, W. Li, *J. Power Sources*, 2015, **274**, 1155-1161.
- 3 Chen, Q., Du, C., Qu, D., Zhang, X. & Tang, Z. *RSC Adv.*, 2015, **5**, 75248-75253.
- 4 H. Yu, Y. Qian, M. Otani, D. Tang, S. Guo, Y. Zhu, H. Zhou, *Energy Environ. Sci.*, 2014, **7**, 1068.
- 5 Bhuvaneswari, D., Babu, G. & Kalaiselvi, N. *Electrochim. Acta*, 2013, **109**, 684-693.
- 6 S.J. Shi, Y.J. Mai, Y.Y. Tang, C.D. Gu, X.L. Wang, J.P. Tu, *Electrochim. Acta*, 2012, **77**, 39-46.

- 7 C. Ban, Z. li, Z. Wu, M.J. Kirkham, L. Chen, Y.S. Jung, E.A. Payzant, Y. Yan, M.S. Whittingham, A.C. Dillon, *Adv. Energy Mater.*, 2011, **1**, 58-62.
- 8 Ni, J., Zhou, H., Chen, J. & Zhang, X. *Electrochim. Acta*, 2008, **53**, 3075-3083.
